# Supplementary material for: Blood pressure and cardiovascular diseases in Chinese adults with type 2 diabetes: A prospective cohort study
Source: PubMed Central journal article supplement (PMC8315364; doi:10.1016/j.lanwpc.2020.100085), 2021-01-23

*This page is intentionally left blank*

## Supplementary appendix, Table of Contents

Page 3: China Kadoorie Biobank collaborative group and members

Page 4: Table S1. Prevalence, treatment and control of hypertension among individuals with self-reported and screen-detected type 2 diabetes

Page 5: Table S2. Prevalence, treatment and control of hypertension among individuals with type 2 diabetes

Page 6: Figure S1. 10-year cardiovascular disease risk by hypertension status among individuals with and without type 2 diabetes

Page 7: Figure S2. Associations of usual DBP with major cardiovascular diseases and all-cause mortality by diabetes status

Page 8: Figure S3. Associations of usual SBP with cardiovascular diseases and all-cause mortality among individuals with type 2 diabetes, additionally adjusted for DBP

Page 9: Figure S4. Associations of usual DBP with cardiovascular diseases and all-cause mortality among individuals with type 2 diabetes, additionally adjusted for SBP

Page 10: Figure S5. Associations of usual SBP with cardiovascular diseases and all-cause mortality among individuals with type 2 diabetes by age

Page 11: Figure S6. Risks of major coronary event, total stroke and cardiovascular death per 10 mmHg higher usual SBP among individuals with type 2 diabetes

Page 12: Figure S7. Risks of cardiovascular death per 10 mmHg higher usual SBP among individuals with type 2 diabetes by study area

Page 13: Figure S8. Associations of usual SBP with major cardiovascular diseases and all-cause mortality among individuals with self-reported and screen-detected type 2 diabetes

Page 14: Figure S9. Associations of usual SBP with major cardiovascular diseases and all-cause mortality among individuals with type 2 diabetes by self-reported hypertension status

Page 15: Figure S10. Associations of usual SBP with major cardiovascular diseases and all-cause mortality among individuals with type 2 diabetes, not excluding individuals with prior cardiovascular diseases

Page 16: Figure S11. Associations of usual SBP with all-cause mortality among individuals with type 2 diabetes excluding individuals with (a) prior chronic diseases and (b) prior chronic diseases and poor self-reported health

Page 17: Figure S12. Associations of usual SBP with major cardiovascular diseases and all-cause mortality by diabetes status

## China Kadoorie Biobank collaborative group and members

**International Steering Committee:** Junshi Chen, Zhengming Chen (PI), Robert Clarke, Rory Collins, Yu Guo, Liming Li (PI), Jun Lv, Richard Peto, Robin Walters.

**International Co-ordinating Centre, Oxford:** Daniel Avery, Derrick Bennett, Ruth Boxall, Fiona Bragg, Yumei Chang, Yiping Chen, Zhengming Chen, Robert Clarke, Huaidong Du, Simon Gilbert, Alex Hacker, Michael Holmes, Andri Iona, Christiana Kartsonaki, Rene Kerosi, Sarah Lewington, Garry Lancaster, Kuang Lin, John McDonnell, Iona Millwood, Qunhua Nie, Paul Ryder, Sam Sansome, Dan Schmidt, Paul Sherliker, Rajani Sohoni, Becky Stevens, Iain Turnbull, Robin Walters, Lin Wang, Neil Wright, Ling Yang, Xiaoming Yang.

**National Co-ordinating Centre, Beijing:** Ge Chen, Yu Guo, Xiao Han, Can Hou, Jun Lv, Pei Pei, Shuzhen Qu, Yunlong Tan, Canqing Yu.

**10 Regional Co-ordinating Centres:** **Qingdao** Qingdao CDC: Zengchang Pang, Ruqin Gao, Shaojie Wang, Yongmei Liu, Ranran Du, Yajing Zang, Liang Cheng, Xiaocao Tian, Hua Zhang. **Licang** CDC: Silu Lv, Junzheng Wang, Wei Hou. **Heilongjiang** Provincial CDC: Jiyuan Yin, Ge Jiang, Xue Zhou. **Nangang** CDC: Liqiu Yang, Hui He, Bo Yu, Yanjie Li, Huaiyi Mu, Qinai Xu, Meiling Dou, Jiaojiao Ren. **Hainan** Provincial CDC: Shanqing Wang, Ximin Hu, Hongmei Wang, Jinyan Chen, Yan Fu, Zhenwang Fu, Xiaohuan Wang. **Meilan** CDC: Min Weng, Xiangyang Zheng, Yilei Li, Huimei Li, Yanjun Wang. **Jiangsu** Provincial CDC: Ming Wu, Jinyi Zhou, Ran Tao, Jie Yang. **Suzhou** CDC: Chuanming Ni, Jun Zhang, Yihe Hu, Yan Lu, , Liangcai Ma, Aiyu Tang, Shuo Zhang, Jianrong Jin, Jingchao Liu. **Guangxi** Provincial CDC: Zhenzhu Tang, Naying Chen, Ying Huang. **Liuzhou** CDC: Mingqiang Li, Jinhuai Meng, Rong Pan, Qilian Jiang, Weiyuan Zhang, Yun Liu, Liuping Wei, Liyuan Zhou, Ningyu Chen, Hairong Guan. **Sichuan** Provincial CDC: Xianping Wu, Ningmei Zhang, Xiaofang Chen, Xuefeng Tang. **Pengzhou** CDC: Guojin Luo, Jianguo Li, Xiaofang Chen, Xunfu Zhong, Jiaqiu Liu, Qiang Sun. **Gansu** Provincial CDC: Pengfei Ge, Xiaolan Ren, Caixia Dong. **Maiji** CDC: Hui Zhang, Enke Mao, Xiaoping Wang, Tao Wang, Xi Zhang. **Henan** Provincial CDC: Ding Zhang, Gang Zhou, Shixian Feng, Liang Chang, Lei Fan. **Huixian** CDC: Yulian Gao, Tianyou He, Huarong Sun, Pan He, Chen Hu, Qiannan Lv, Xukui Zhang. **Zhejiang** Provincial CDC: Min Yu, Ruying Hu, Hao Wang. **Tongxiang** CDC: Yijian Qian, Chunmei Wang, Kaixue Xie, Lingli Chen, Yidan Zhang, Dongxia Pan. **Hunan** Provincial CDC: Yuelong Huang, Biyun Chen, Li Yin, Donghui Jin, Huilin Liu, Zhongxi Fu, Qiaohua Xu. **Liuyang** CDC: Xin Xu, Hao Zhang, Youping Xiong, Huajun Long, Xianzhi Li, Libo Zhang, Zhe Qiu.

**Table S1. Prevalence, treatment and control of hypertension among individuals with self-reported and screen-detected type 2 diabetes**

| Characteristic                  | No. of participants | Hypertension            |                           |                  |                                    |              |
|---------------------------------|---------------------|-------------------------|---------------------------|------------------|------------------------------------|--------------|
|                                 |                     | Self-reported, (%)      |                           | Not on treatment | Screen-detected <sup>§</sup> , (%) | Any, (%)     |
|                                 |                     | On treatment            | Uncontrolled <sup>‡</sup> |                  |                                    |              |
|                                 |                     | Controlled <sup>†</sup> |                           |                  |                                    |              |
| <b>Self-reported diabetes</b>   |                     |                         |                           |                  |                                    |              |
| <b>Overall</b>                  | 13219               | 352 (2.7)               | 3092 (23.4)               | 709 (5.4)        | 5856 (44.3)                        | 10009 (75.7) |
| <b>Age, years</b>               |                     |                         |                           |                  |                                    |              |
| 30-59                           | 7222                | 159 (2.3)               | 1300 (18.1)               | 359 (4.9)        | 3263 (44.3)                        | 5081 (70.4)  |
| 60-69                           | 4387                | 134 (2.9)               | 1254 (28.2)               | 261 (5.9)        | 1899 (44.0)                        | 3548 (80.9)  |
| 70-79                           | 1610                | 59 (3.3)                | 538 (33.6)                | 89 (5.6)         | 694 (43.5)                         | 1380 (85.7)  |
| <b>Sex</b>                      |                     |                         |                           |                  |                                    |              |
| Men                             | 5005                | 112 (2.2)               | 961 (19.2)                | 278 (5.6)        | 2392 (47.8)                        | 3743 (74.8)  |
| Women                           | 8214                | 240 (2.9)               | 2131 (25.9)               | 431 (5.2)        | 3464 (42.2)                        | 6266 (76.3)  |
| <b>Region</b>                   |                     |                         |                           |                  |                                    |              |
| Rural                           | 5036                | 101 (2.1)               | 1185 (24.3)               | 278 (5.6)        | 2384 (47.3)                        | 3948 (78.4)  |
| Urban                           | 8183                | 251 (3.1)               | 1907 (22.9)               | 431 (5.2)        | 3472 (42.2)                        | 6061 (74.1)  |
| <b>Screen-detected diabetes</b> |                     |                         |                           |                  |                                    |              |
| <b>Overall</b>                  | 13096               | 142 (1.1)               | 1789 (13.7)               | 445 (3.4)        | 7537 (57.6)                        | 9913 (75.7)  |
| <b>Age, years</b>               |                     |                         |                           |                  |                                    |              |
| 30-59                           | 8481                | 77 (0.9)                | 888 (10.4)                | 251 (2.9)        | 4921 (57.6)                        | 6137 (72.4)  |
| 60-69                           | 3352                | 55 (1.6)                | 639 (19.3)                | 144 (4.1)        | 1857 (55.8)                        | 2695 (80.4)  |
| 70-79                           | 1263                | 10 (0.7)                | 262 (20.8)                | 50 (4.1)         | 759 (60.6)                         | 1081 (85.6)  |
| <b>Sex</b>                      |                     |                         |                           |                  |                                    |              |
| Men                             | 5168                | 33 (0.6)                | 634 (12.3)                | 186 (3.6)        | 3155 (61.0)                        | 4008 (77.6)  |
| Women                           | 7928                | 109 (1.4)               | 1155 (14.6)               | 259 (3.3)        | 4382 (55.3)                        | 5905 (74.5)  |
| <b>Region</b>                   |                     |                         |                           |                  |                                    |              |
| Rural                           | 5900                | 54 (0.9)                | 731 (12.5)                | 216 (3.7)        | 3540 (60.3)                        | 4541 (77.0)  |
| Urban                           | 7196                | 88 (1.2)                | 1058 (14.6)               | 229 (3.1)        | 3997 (54.8)                        | 5372 (74.7)  |

\*Standardised to age, sex and study area structure of the population; <sup>†</sup>SBP <130mmHg and DBP <80mmHg; <sup>‡</sup>SBP ≥130mmHg or DBP ≥80mmHg; <sup>§</sup>No self-reported hypertension and SBP ≥130mmHg or DBP ≥80mmHg.

**Table S2. Prevalence, treatment and control of hypertension among individuals with type 2 diabetes**

| Characteristic    | No. of participants | Hypertension            |                                         |                  |                                     |              |
|-------------------|---------------------|-------------------------|-----------------------------------------|------------------|-------------------------------------|--------------|
|                   |                     | Self-reported, (%)*     |                                         |                  | Screen-detected <sup>§</sup> , (%)* | Any, (%)*    |
|                   |                     | Controlled <sup>†</sup> | On treatment<br>Controlled <sup>†</sup> | Not on treatment |                                     |              |
| <b>Overall</b>    | 26315               | 1308 (5.0)              | 4067 (15.5)                             | 1154 (4.4)       | 8235 (31.3)                         | 14764 (56.1) |
| <b>Age, years</b> |                     |                         |                                         |                  |                                     |              |
| 30-59             | 15703               | 650 (4.2)               | 1774 (11.2)                             | 610 (3.9)        | 4593 (28.7)                         | 7627 (48.6)  |
| 60-69             | 7739                | 486 (6.1)               | 1596 (20.6)                             | 405 (5.1)        | 2591 (34.0)                         | 5078 (65.6)  |
| 70-79             | 2873                | 172 (5.7)               | 697 (24.3)                              | 139 (4.9)        | 1051 (37.5)                         | 2059 (71.7)  |
| <b>Sex</b>        |                     |                         |                                         |                  |                                     |              |
| Men               | 10173               | 439 (4.3)               | 1301 (12.8)                             | 464 (4.6)        | 3332 (32.8)                         | 5536 (54.4)  |
| Women             | 16142               | 869 (5.4)               | 2766 (17.1)                             | 690 (4.3)        | 4903 (30.4)                         | 9228 (57.2)  |
| <b>Region</b>     |                     |                         |                                         |                  |                                     |              |
| Rural             | 10936               | 435 (4.0)               | 1636 (15.0)                             | 494 (4.5)        | 3690 (33.7)                         | 6255 (57.2)  |
| Urban             | 15379               | 873 (5.7)               | 2431 (15.8)                             | 660 (4.3)        | 4545 (29.6)                         | 8509 (55.3)  |

\*Standardised to age, sex and study area structure of the population; <sup>†</sup>SBP <140mmHg and DBP <90mmHg; <sup>‡</sup>SBP ≥140mmHg or DBP ≥90mmHg; <sup>§</sup>No self-reported hypertension and SBP ≥140mmHg or DBP ≥90mmHg.

**Figure S1. 10-year cardiovascular disease risk by hypertension status among individuals with and without type 2 diabetes**

Adjusted for age, sex, study area, educational attainment, smoking, alcohol consumption, physical activity and BMI

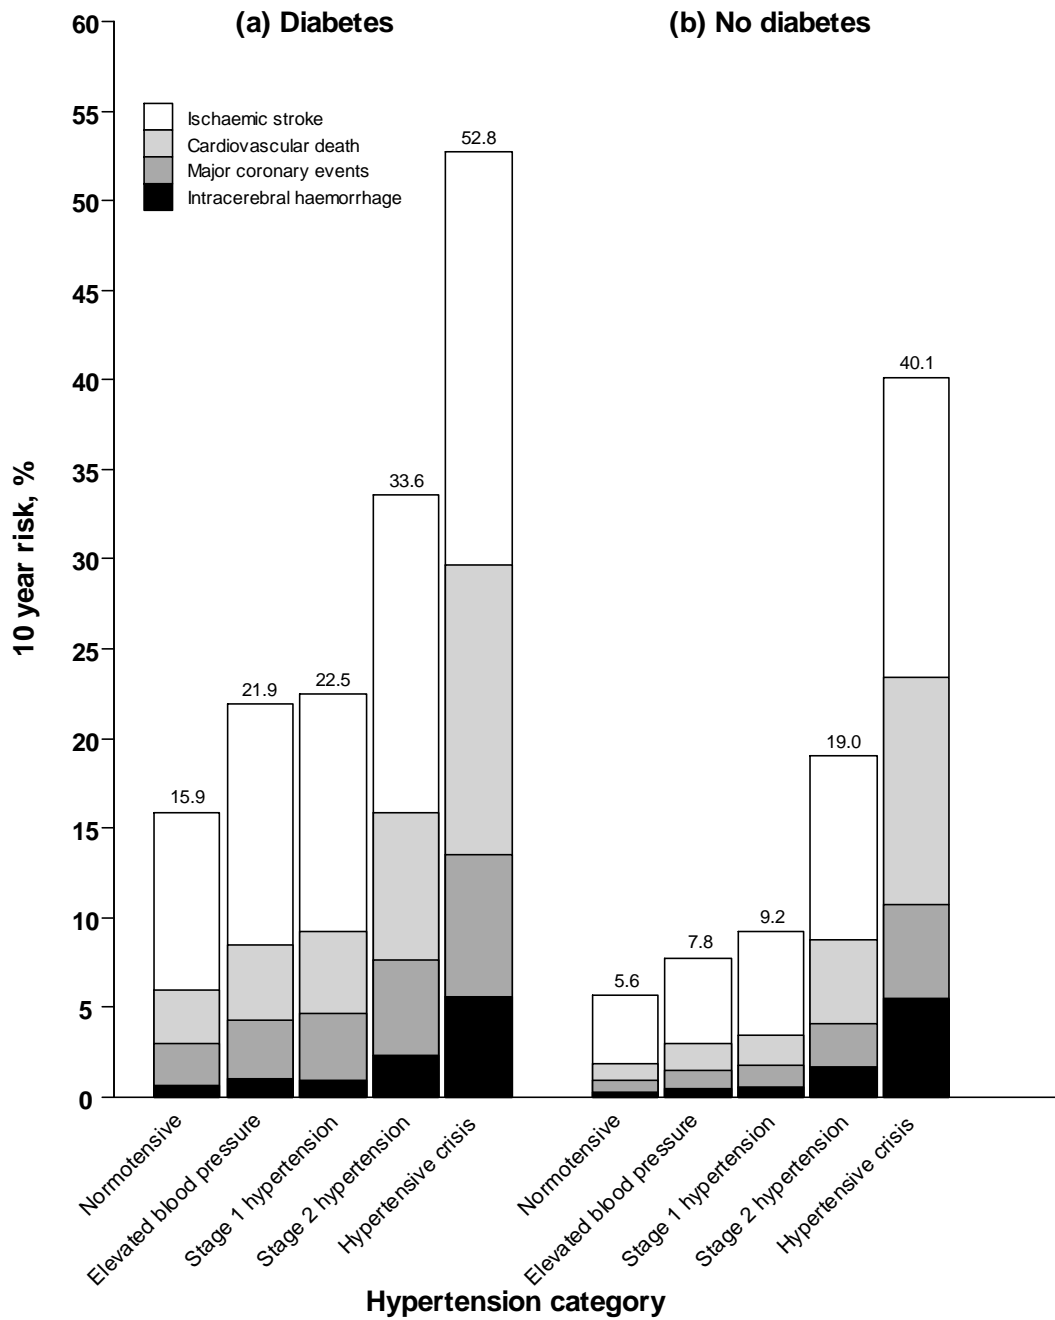

**Figure S2. Associations of usual DBP with major cardiovascular diseases and all-cause mortality by diabetes status**

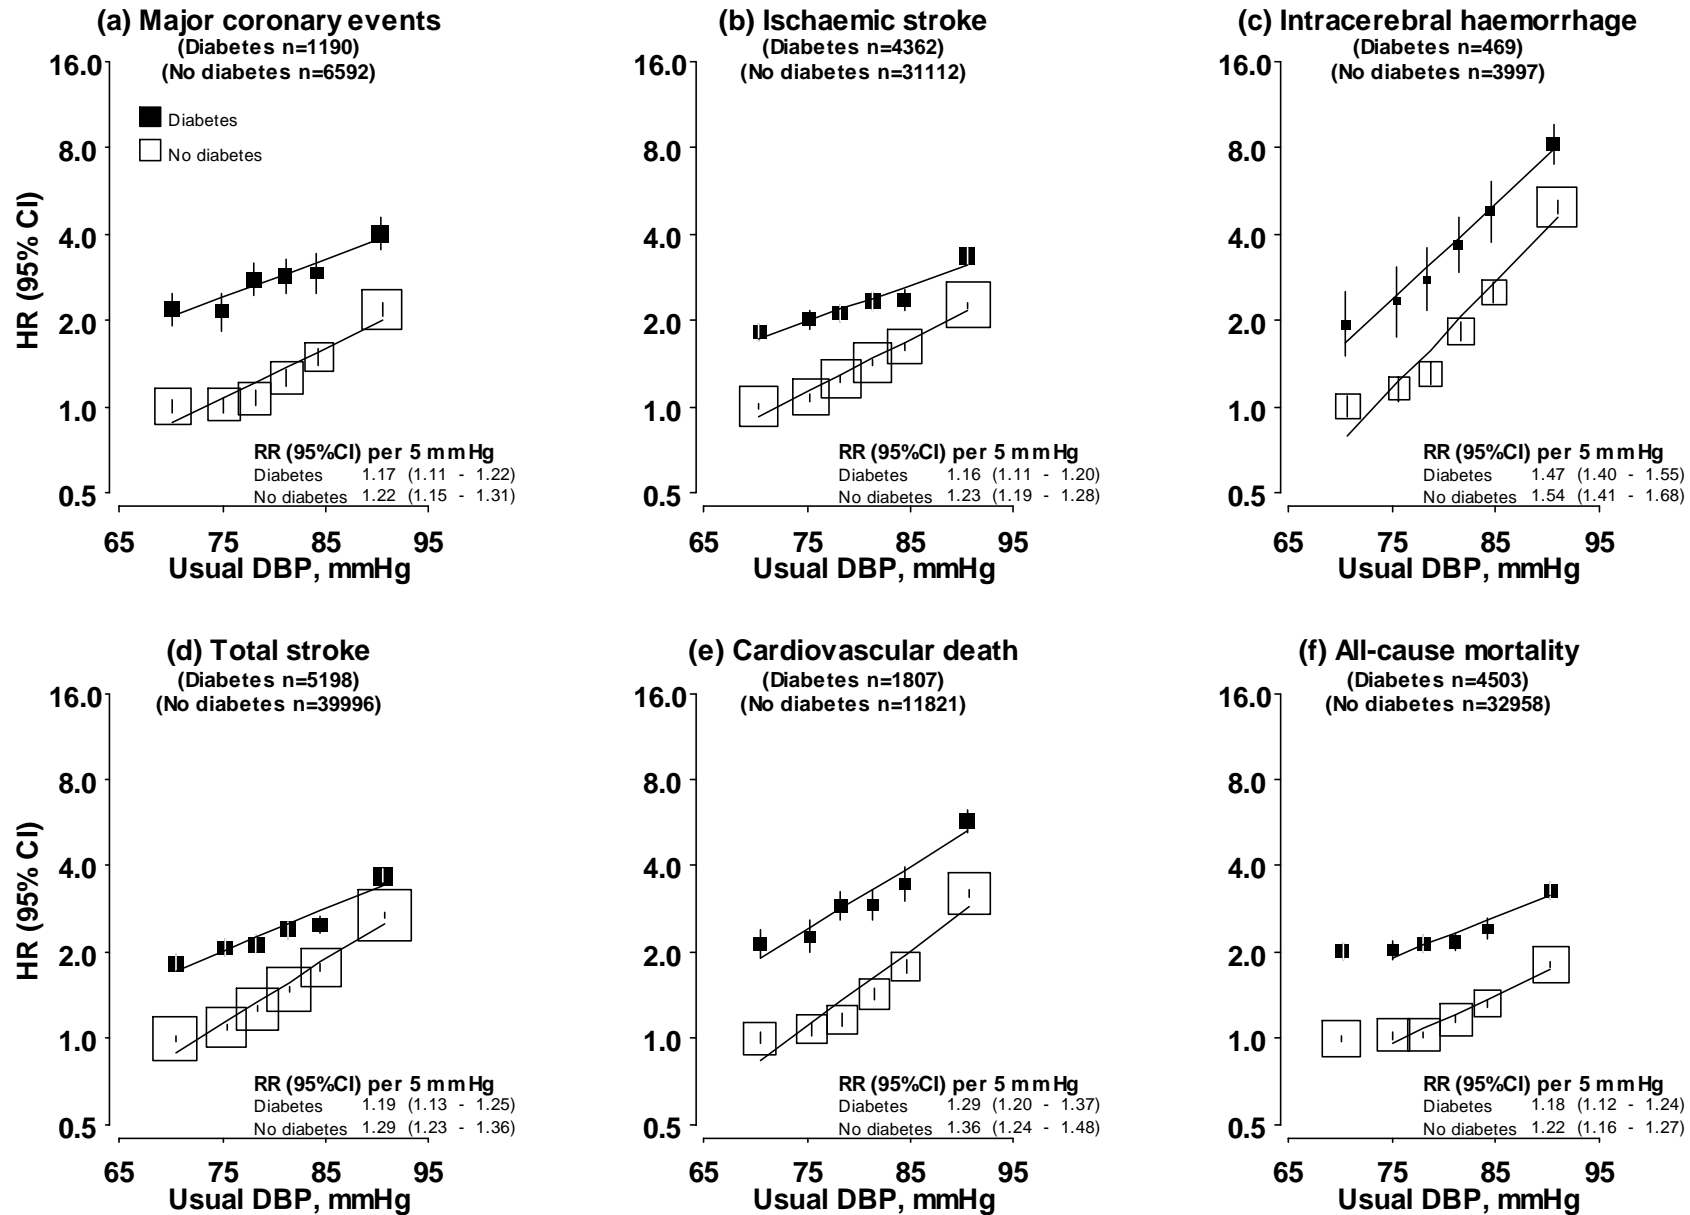



**Figure S3. Associations of usual SBP with cardiovascular diseases and all-cause mortality among individuals with type 2 diabetes, additionally adjusted for DBP**

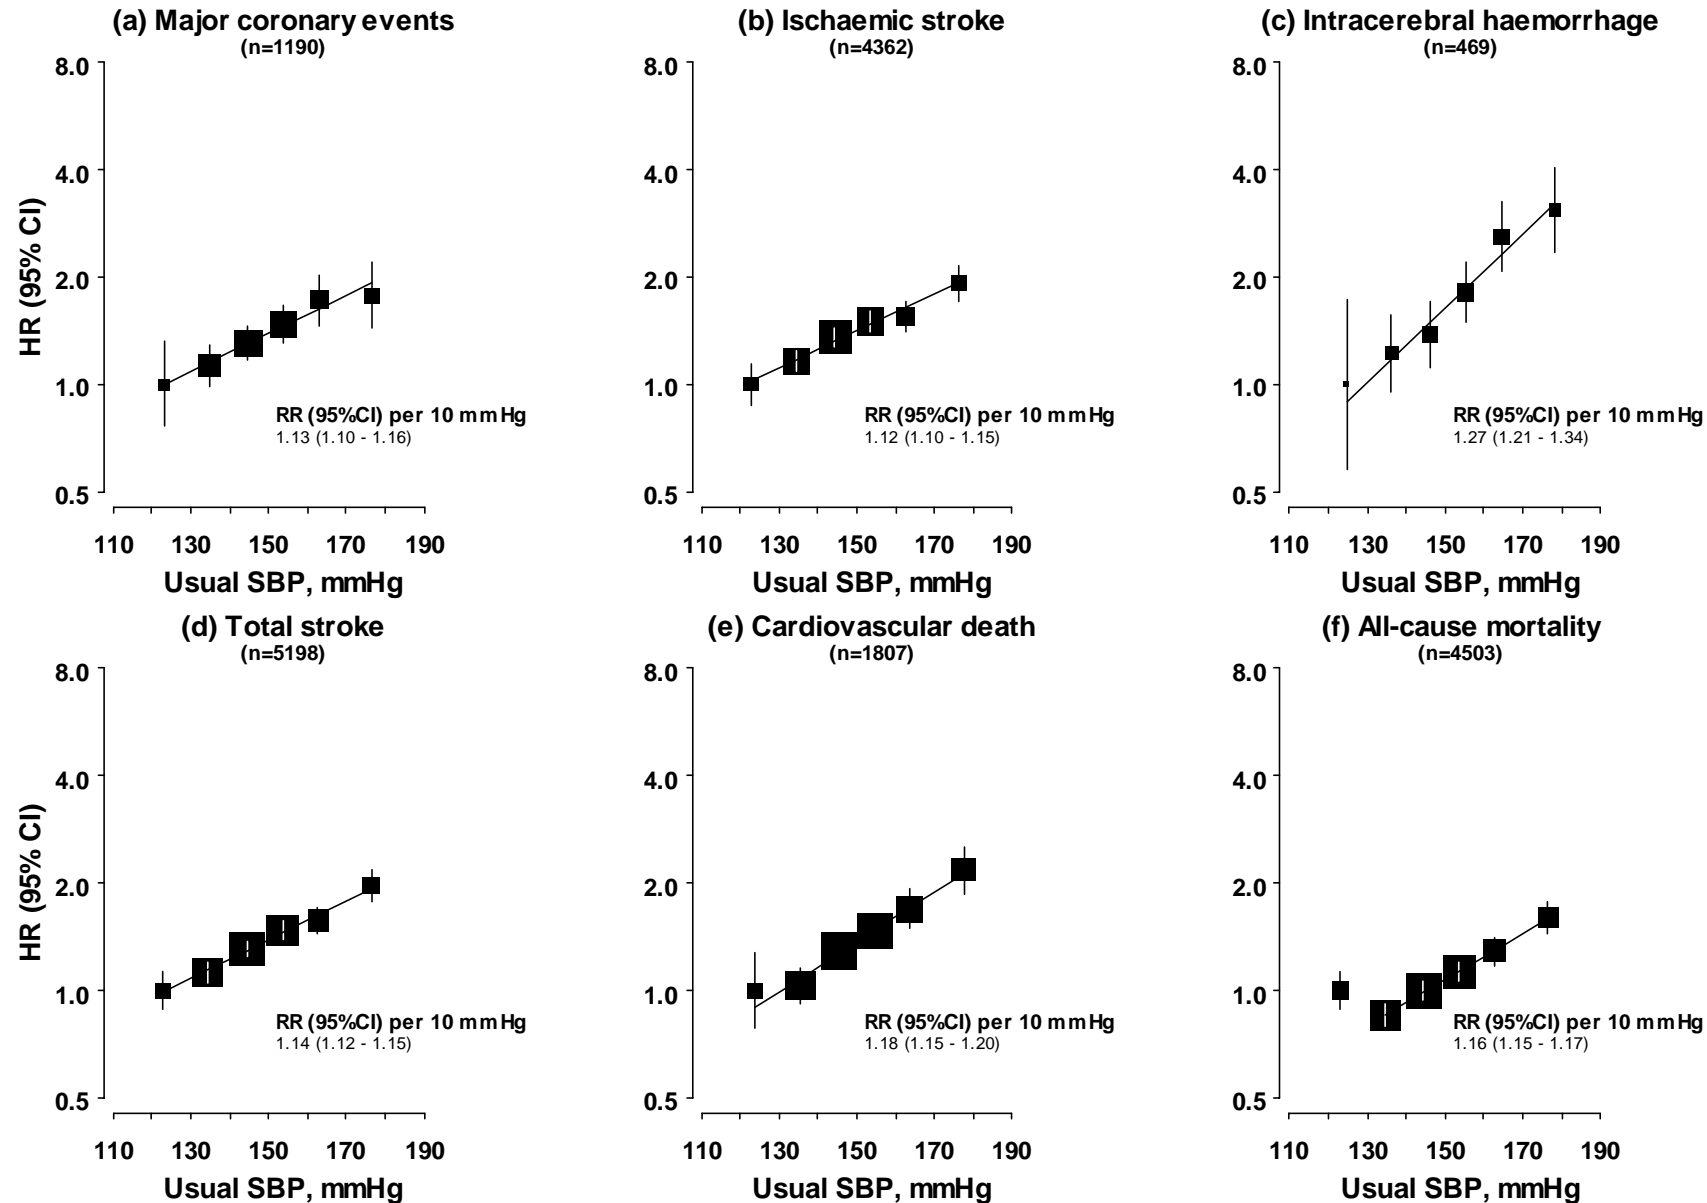

**Figure S4. Associations of usual DBP with cardiovascular diseases and all-cause mortality among individuals with type 2 diabetes, additionally adjusted for SBP**

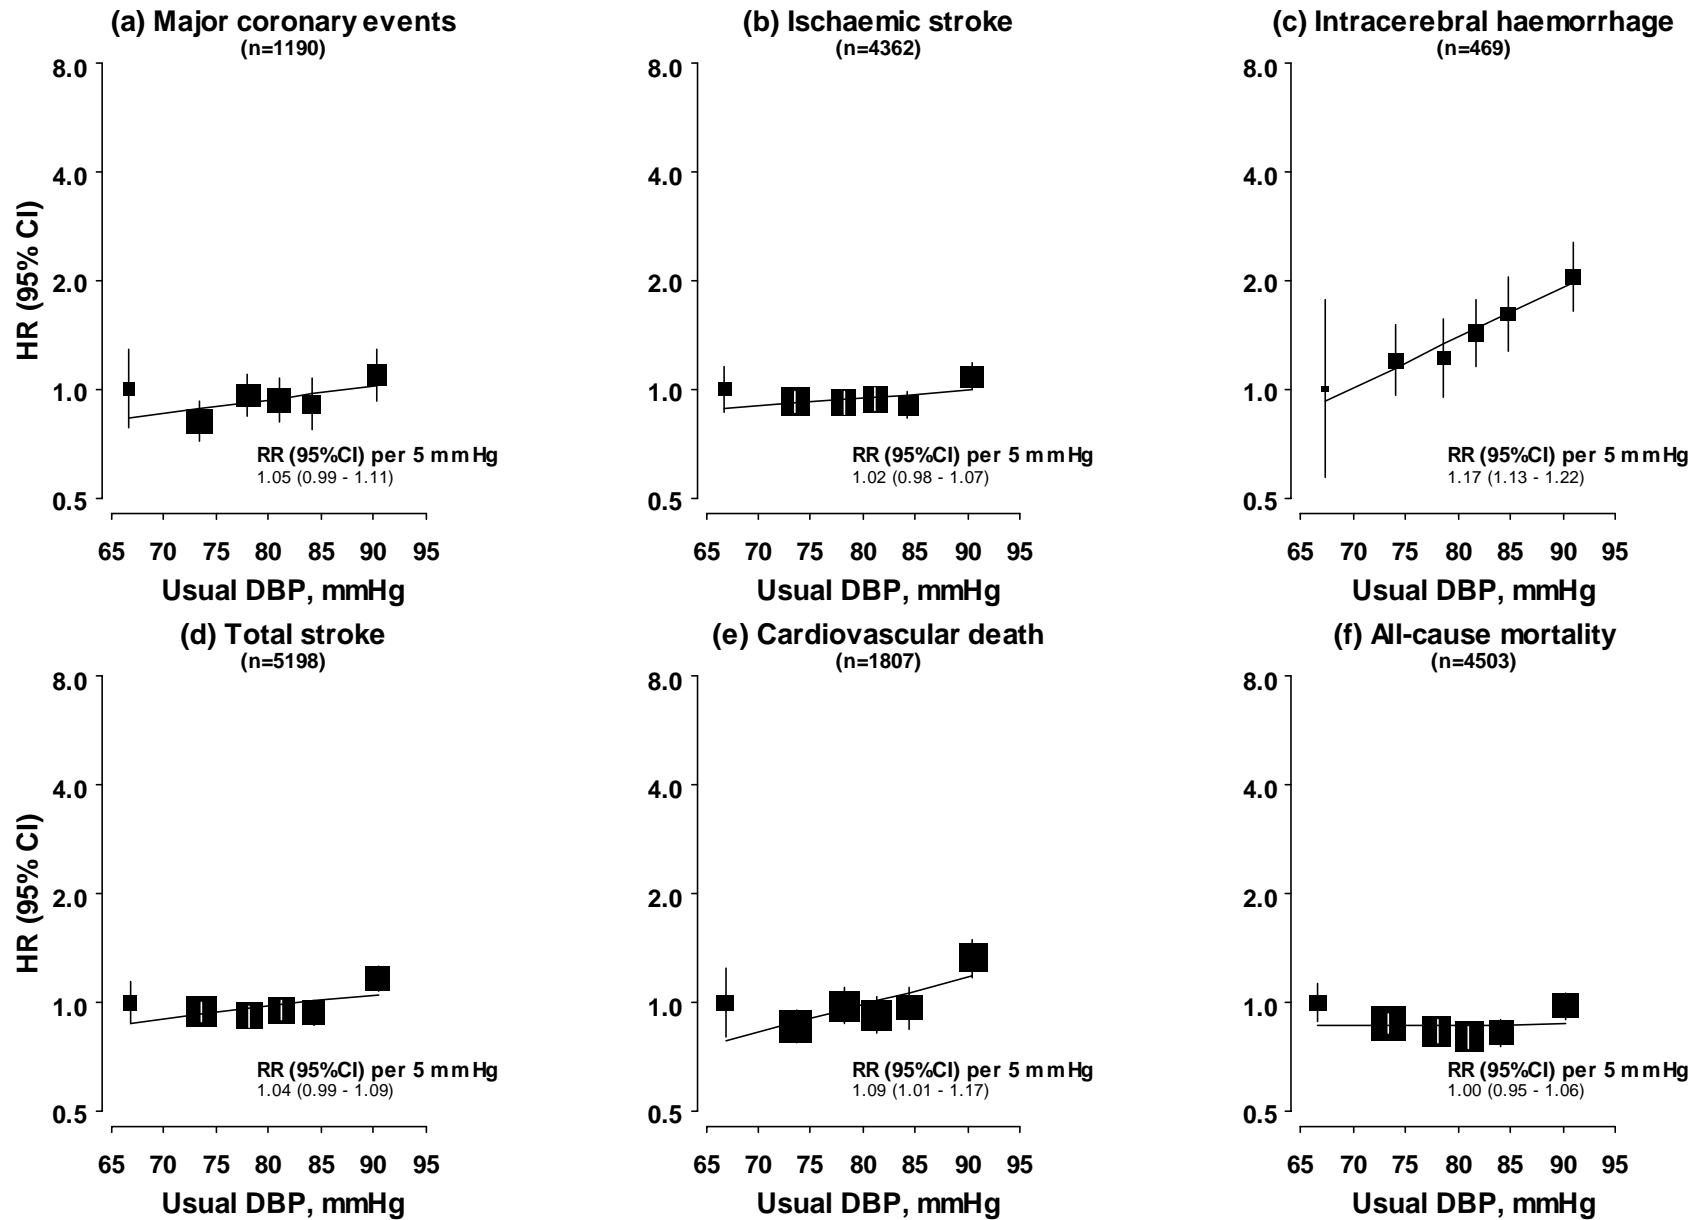

**Figure S5. Associations of usual SBP with cardiovascular diseases and all-cause mortality among individuals with type 2 diabetes by age**

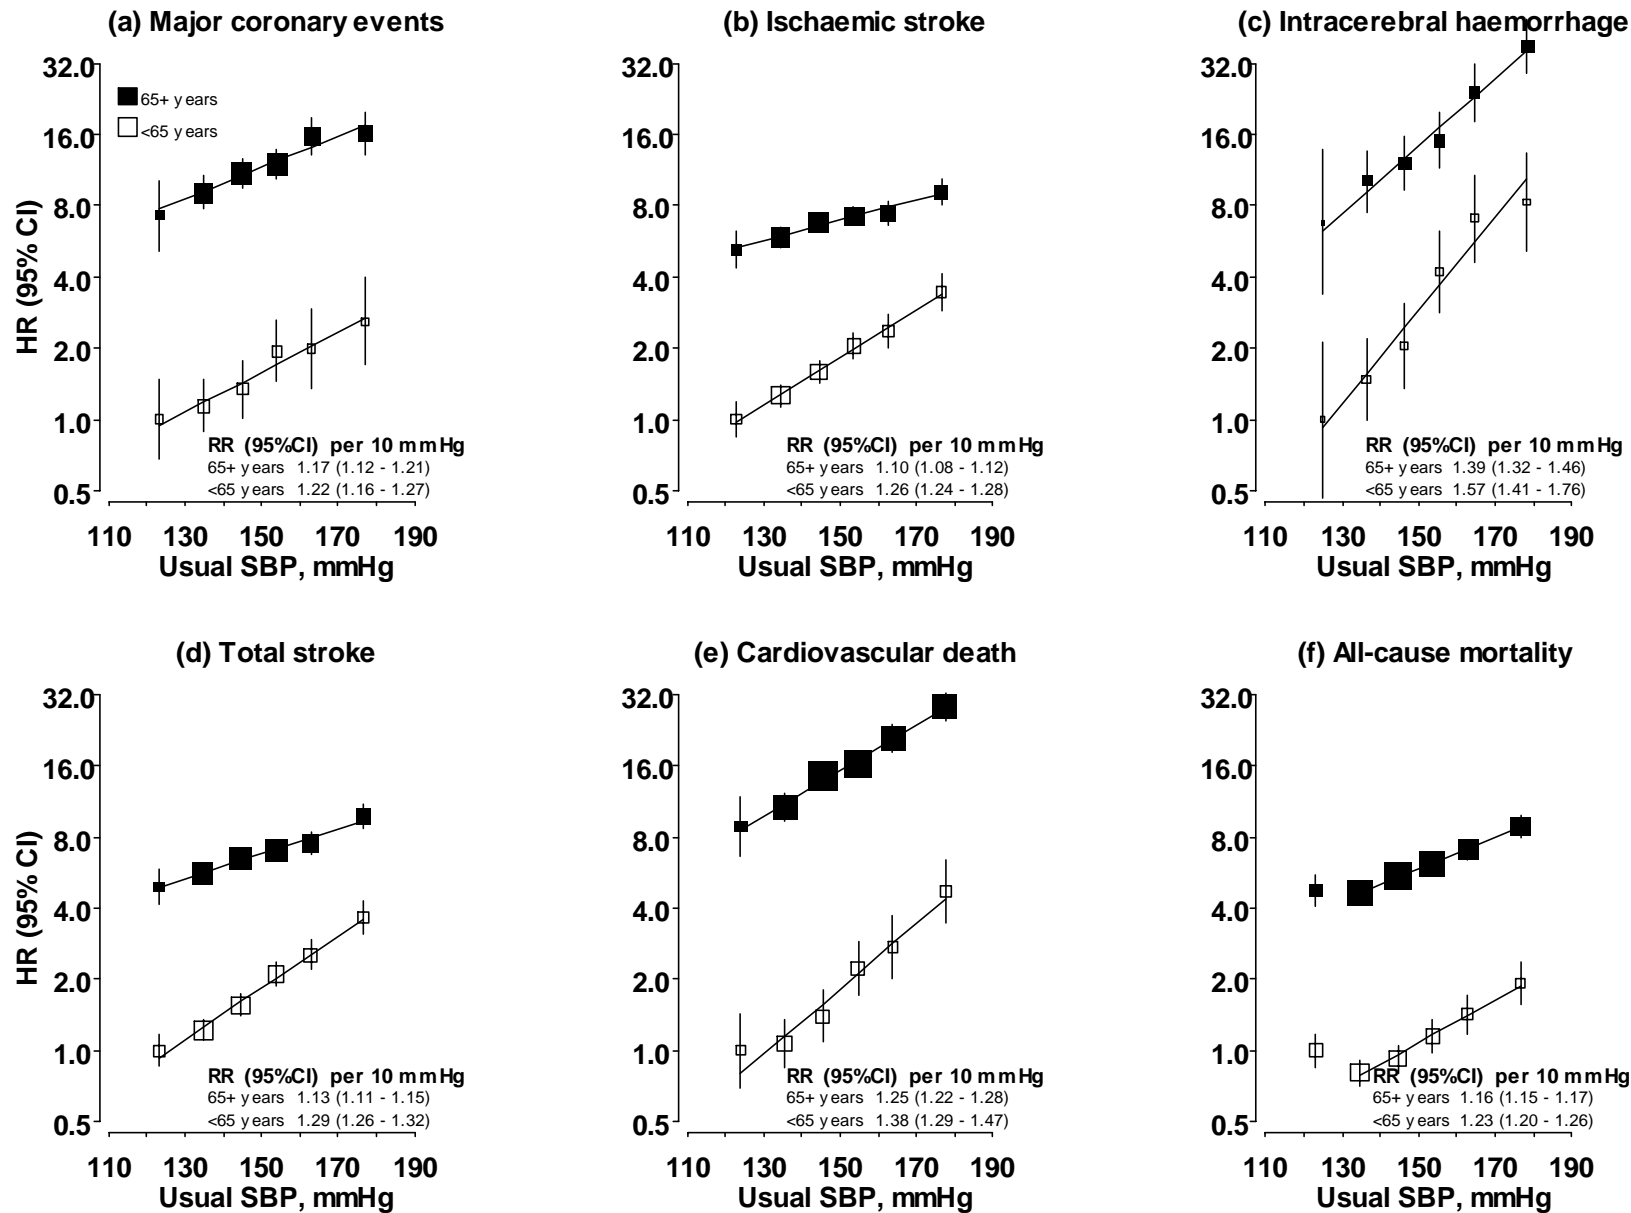

**Figure S6. Risks of major coronary event, total stroke and cardiovascular death per 10 mmHg higher usual SBP among individuals with type 2 diabetes**

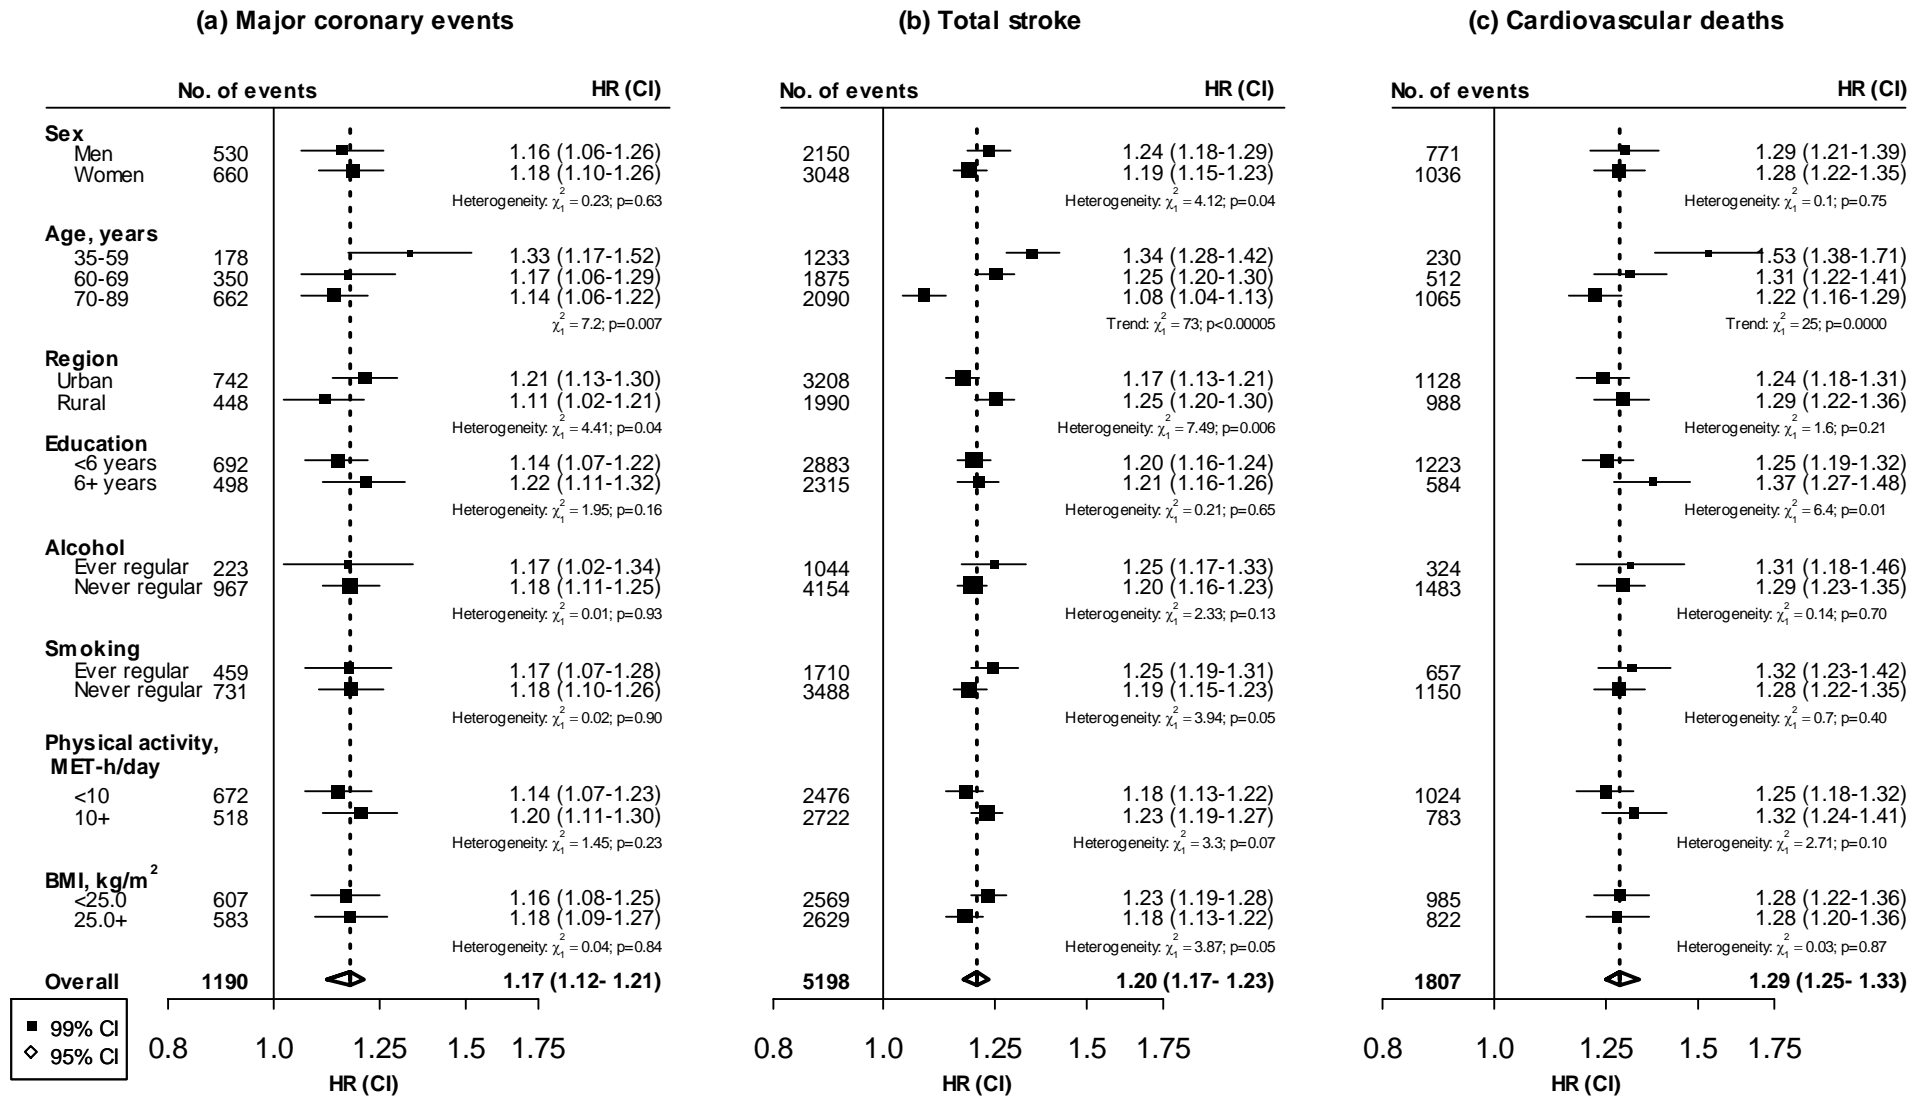

**Figure S7. Risks of cardiovascular death per 10 mmHg higher usual SBP among individuals with type 2 diabetes by study area**

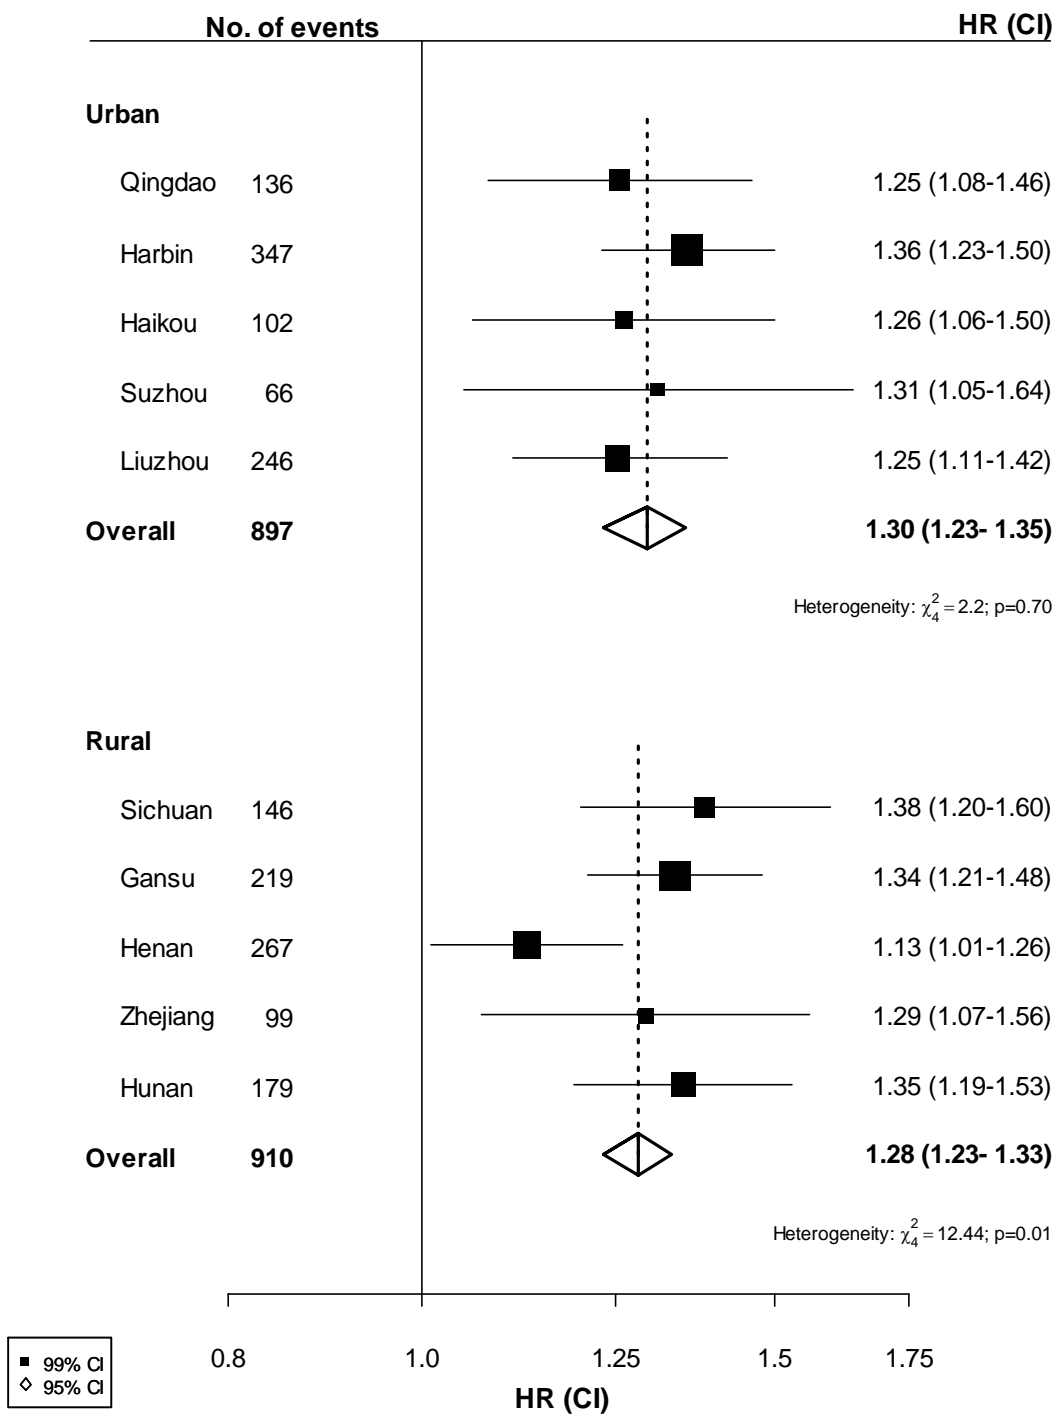

**Figure S8. Associations of usual SBP with major cardiovascular diseases and all-cause mortality among individuals with self-reported and screen-detected type 2 diabetes**

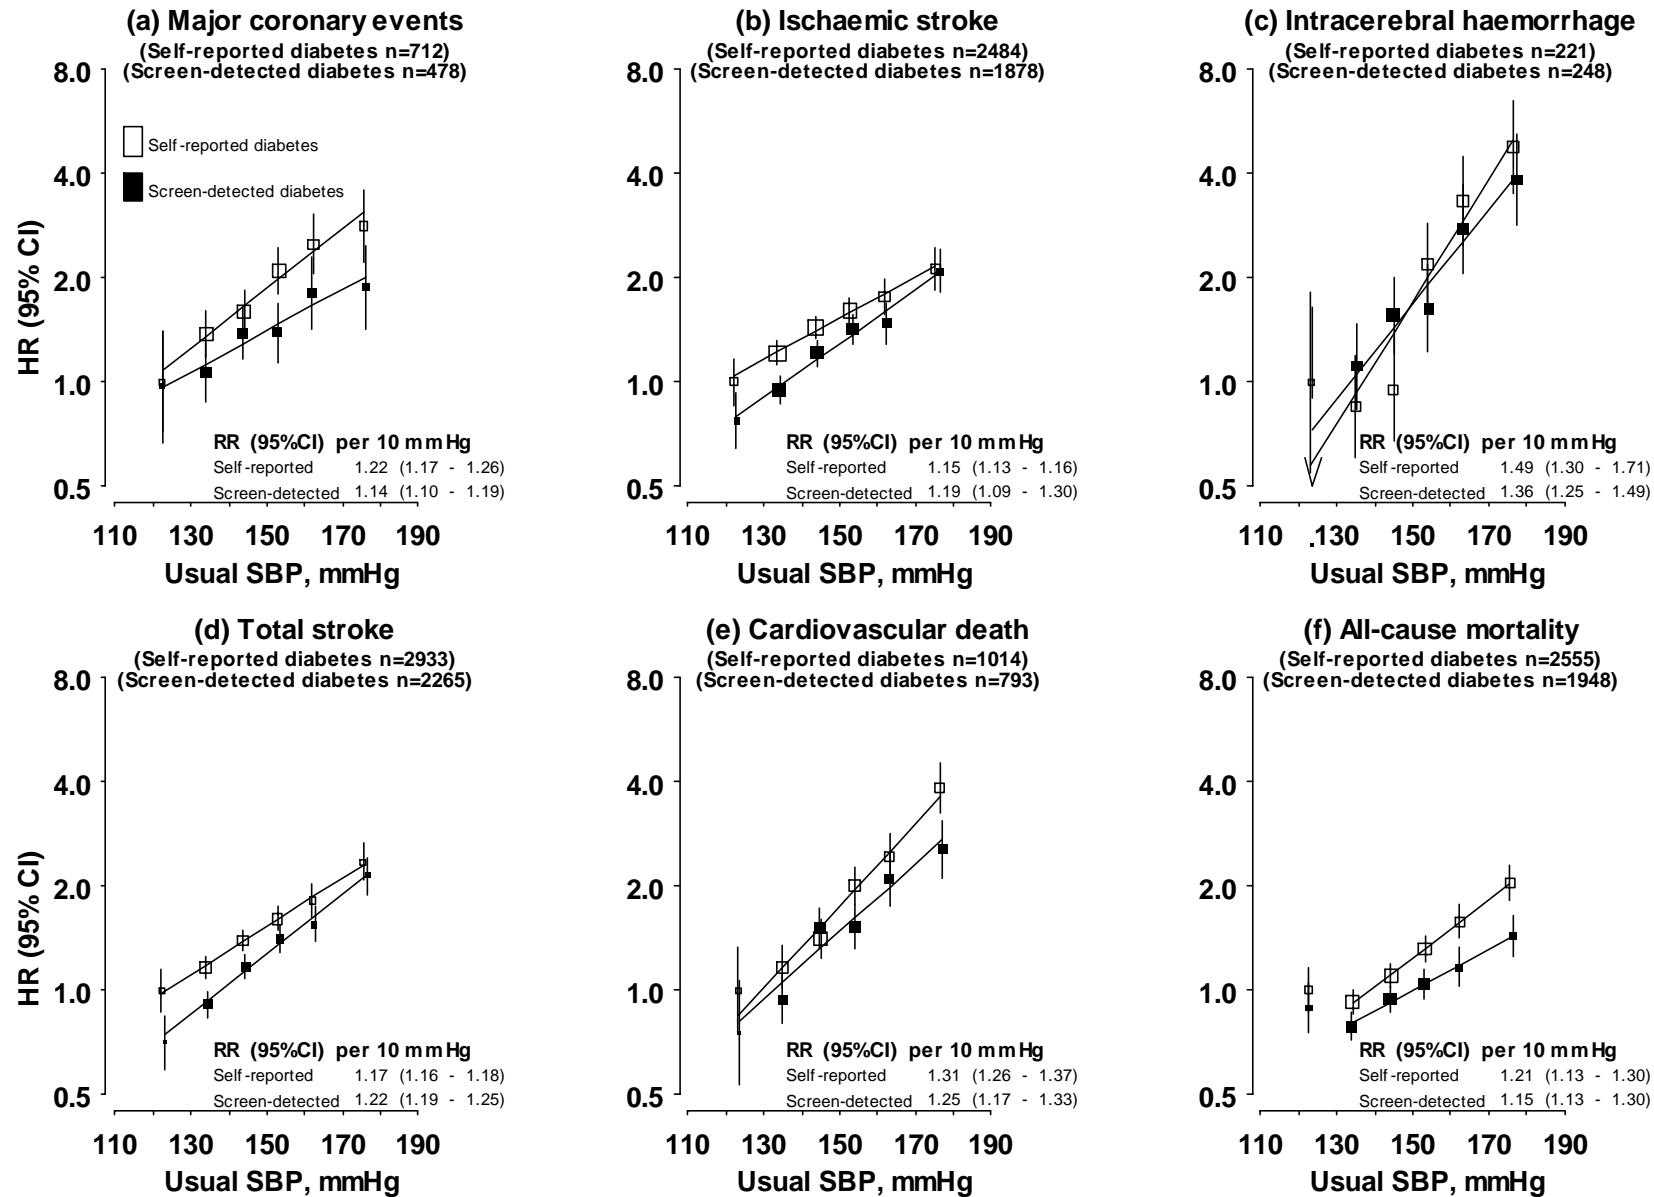

**Figure S9. Associations of usual SBP with major cardiovascular diseases and all-cause mortality among individuals with type 2 diabetes by self-reported hypertension status**

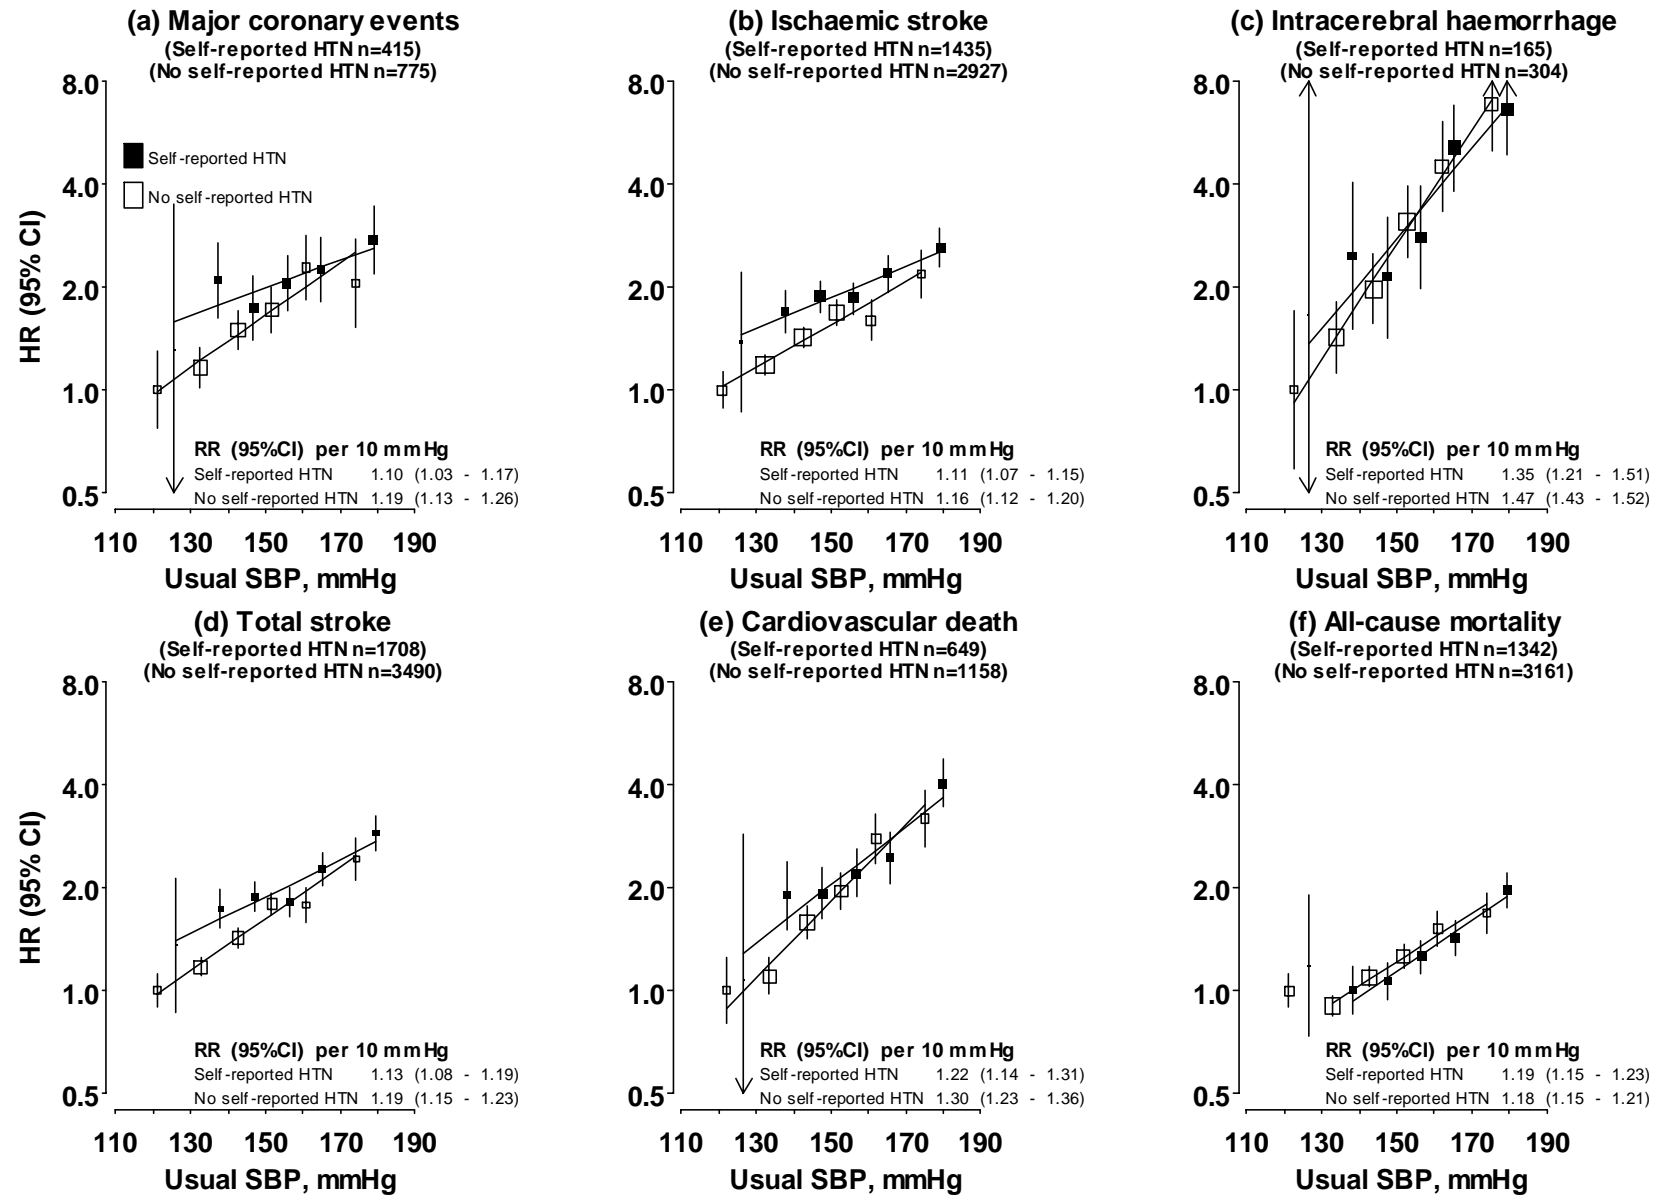

**Figure S10. Associations of usual SBP with major cardiovascular diseases and all-cause mortality among individuals with type 2 diabetes, not excluding individuals with prior cardiovascular diseases**

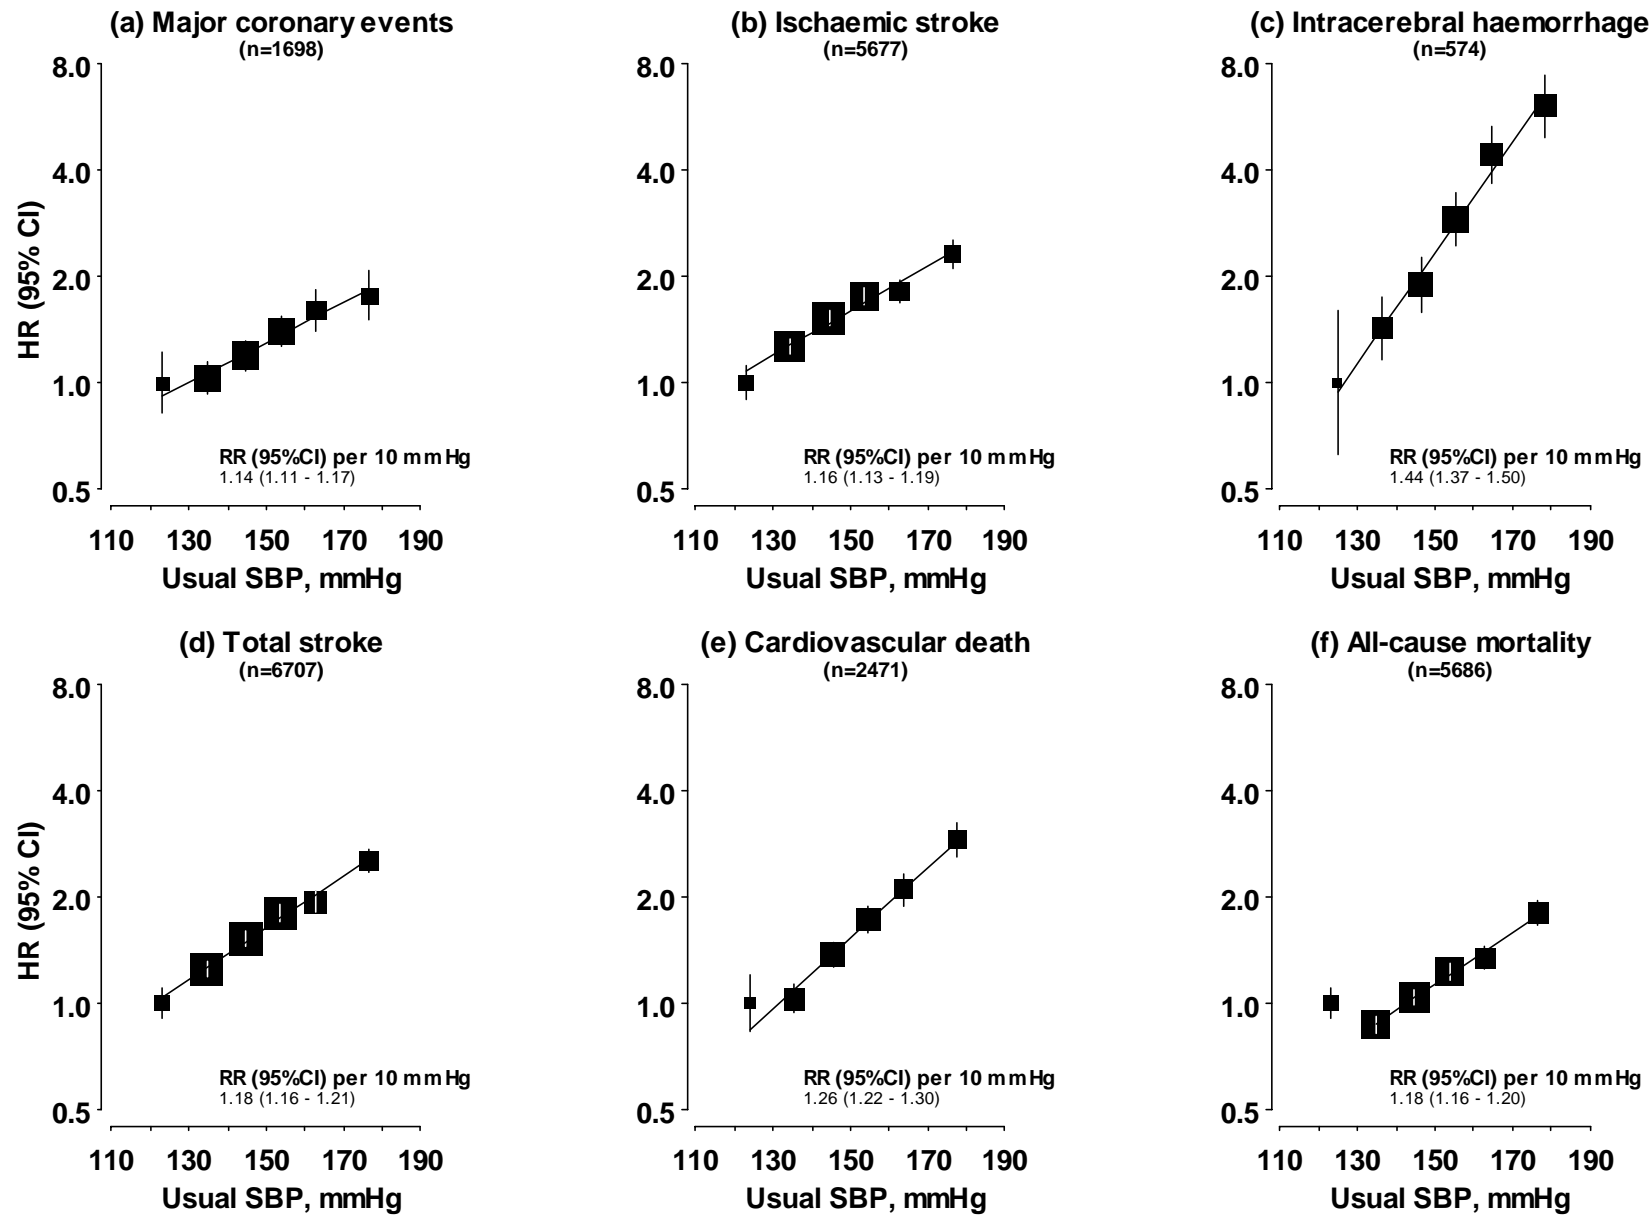



**Figure S11. Associations of usual SBP with all-cause mortality among individuals with type 2 diabetes excluding individuals with (a) prior chronic diseases and (b) prior chronic diseases and poor self-reported health**

Prior chronic diseases: rheumatic heart disease, chronic obstructive pulmonary disease, chronic liver disease and chronic renal disease

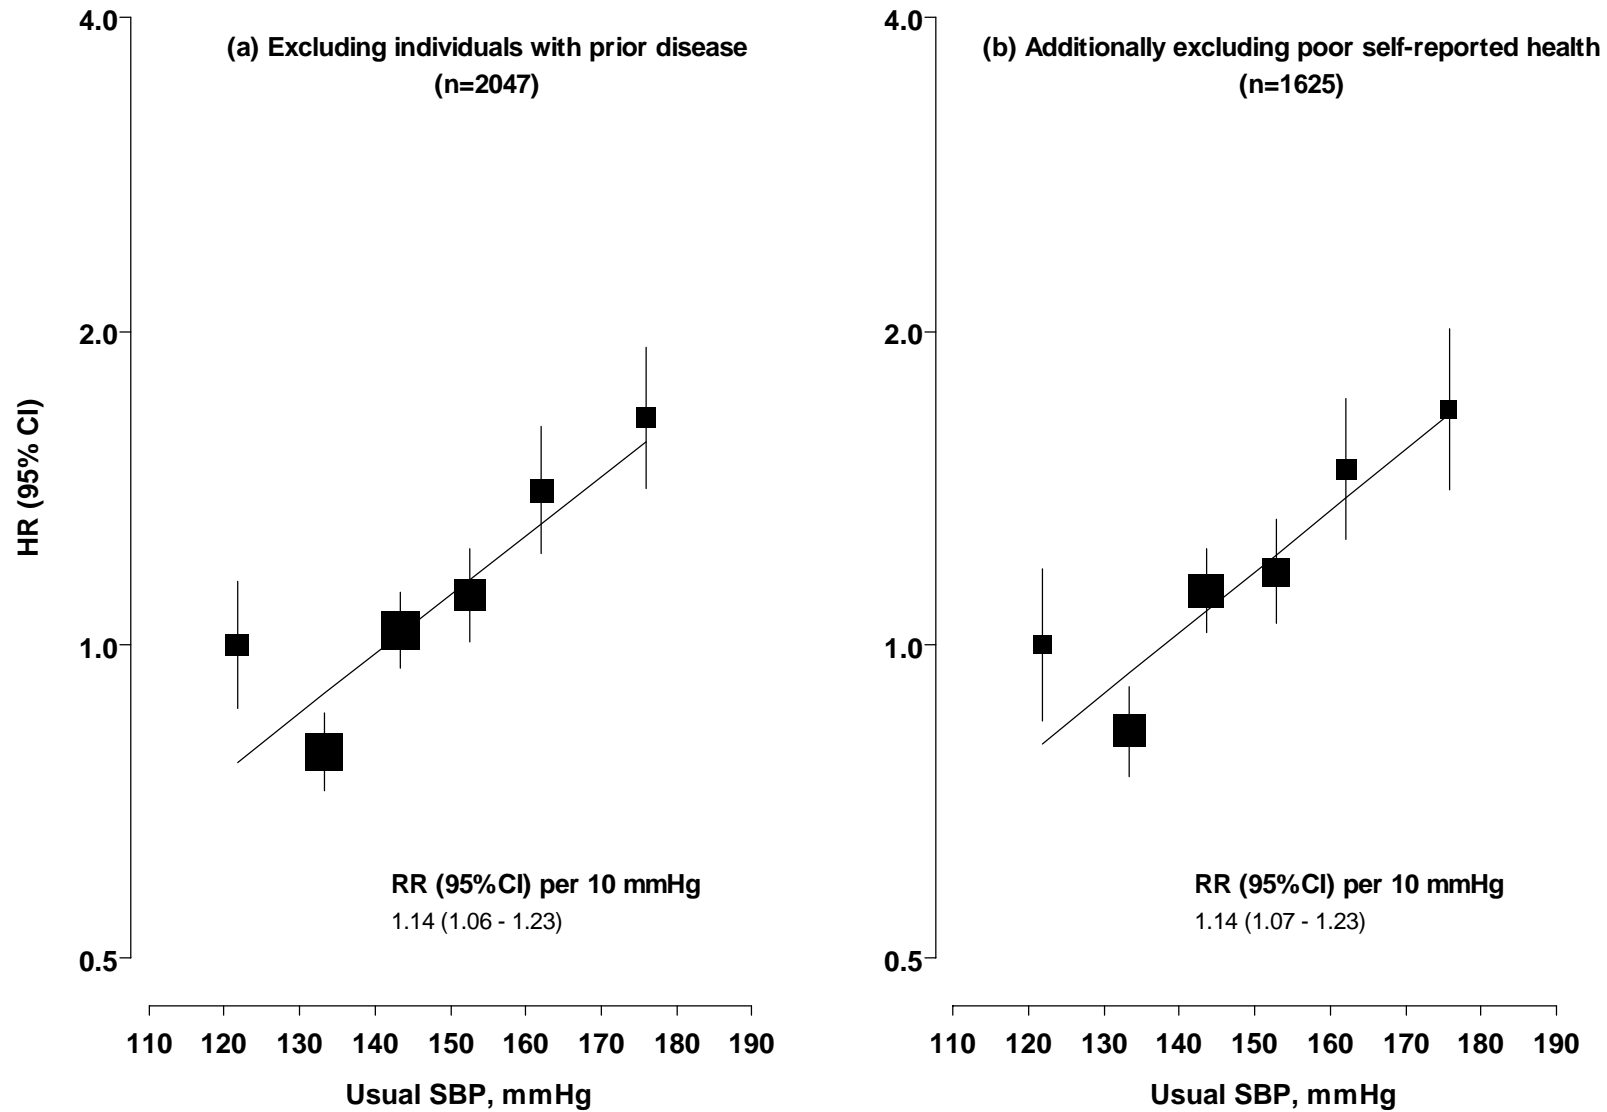

**Figure S12. Associations of usual SBP with major cardiovascular diseases and all-cause mortality by diabetes status**

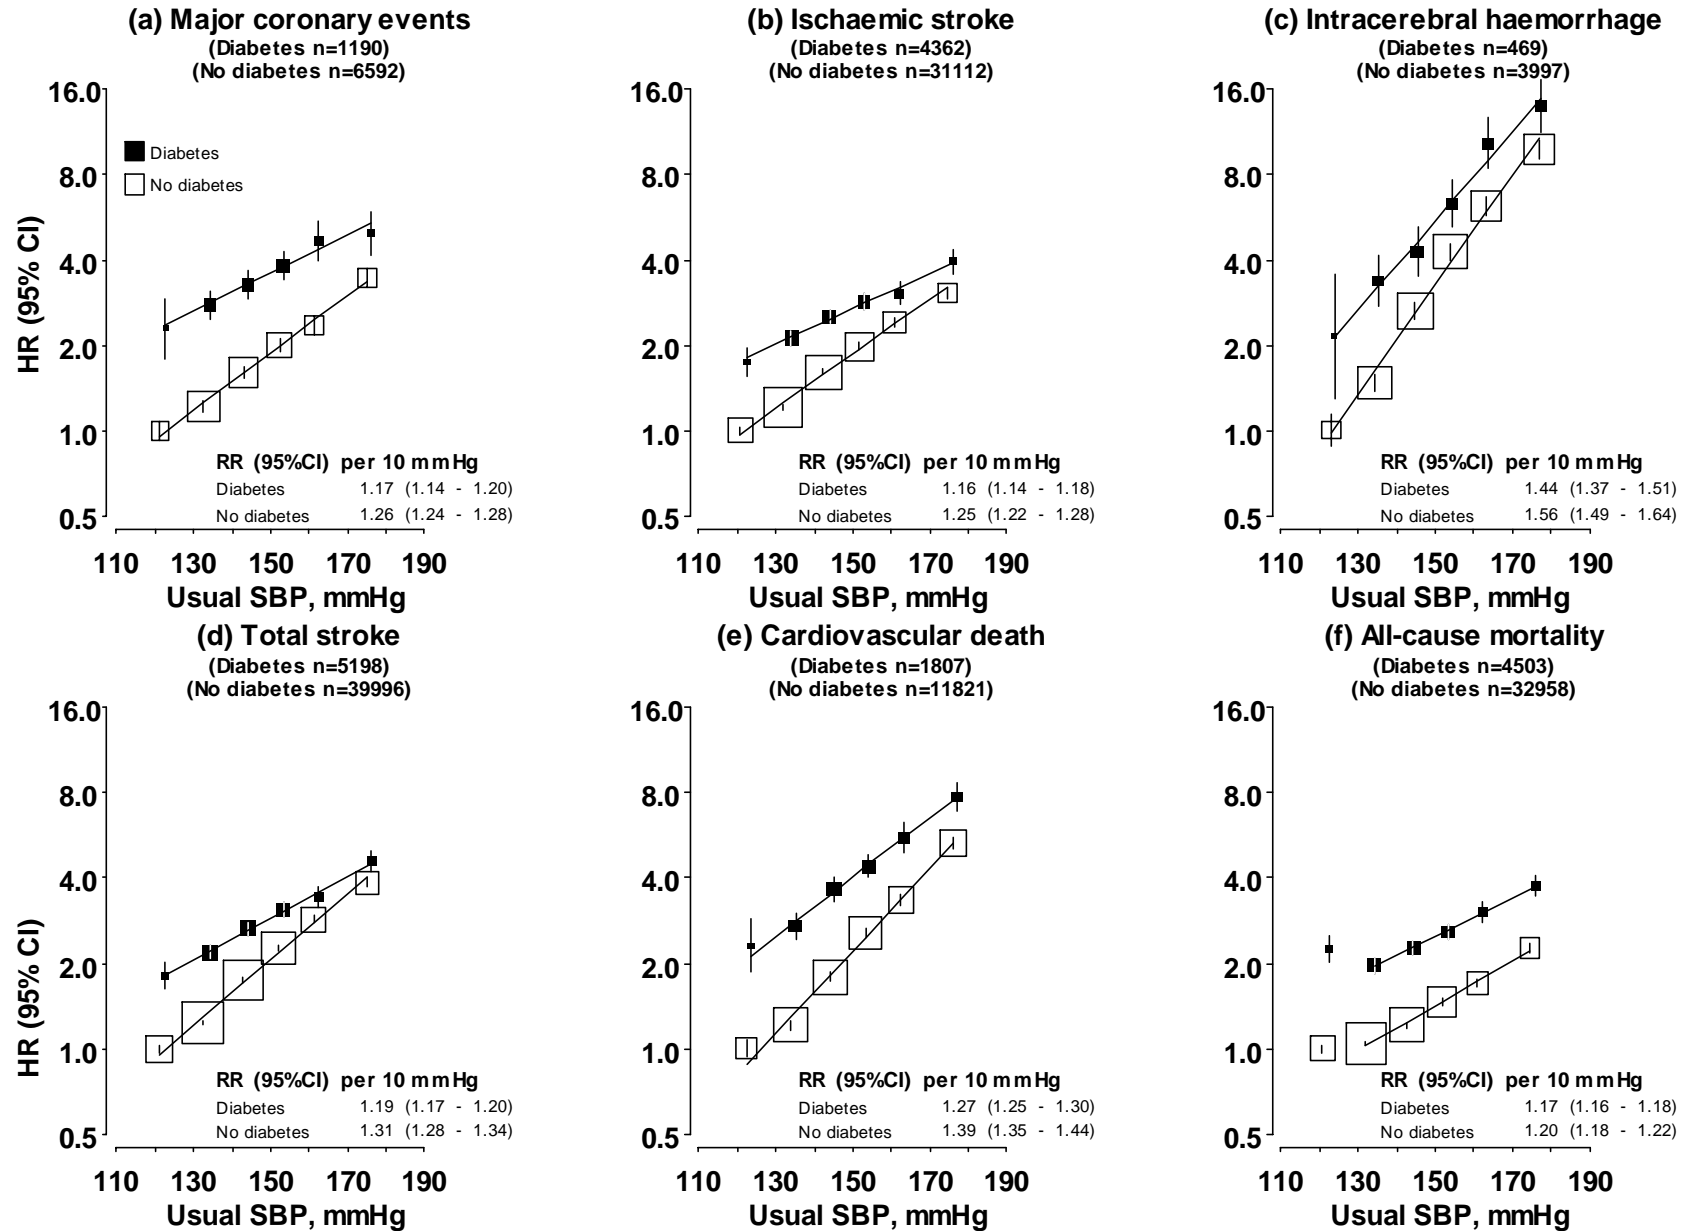

Supplement: mmc1.pdf [file mmc1.pdf]
